# Supplementary material for: Mask-inspired moisture-transmitting and durable thermochromic perovskite smart windows
Source: PubMed Central journal article supplement (PMC10827790; doi:10.1038/s41467-024-45047-y), 2024-01-30
Supplement: 41467_2024_45047_MOESM3_ESM.pdf [file 41467_2024_45047_MOESM3_ESM.pdf]

## Description of Additional Supplementary Files

### **Supplementary Movie Legends:**

**Supplementary Movie 1.** Reversible color switching of the MTPW between the cold and hot states to show the thermochromic effect.

**Supplementary Movie 2.** Light propagation process at the air/window interface of an ideally smooth TPW, a rough TPW and a PTPW in the FDTD simulation.

**Supplementary Movie 3.** Dripping water droplets test to demonstrate the superhydrophobicity of the MTPW.

**Supplementary Movie 4.** Water flushing test to examine the stability of the MTPW.
